# Supplementary material for: Recetas urbanas: la necesidad de inventarse la vivienda
Source: Royal Society of Chemistry journal article supplement (doi:10.1039/d1ra04716g), 2004-01-01
Supplement: d1ra04716g1.pdf [file d1ra04716g1.pdf]

Supporting Information

## Interligand Communication in a Metal Mediated LL'CT System – A Case Study

Sara A. Dille,<sup>[a]</sup> Kyle J. Colston,<sup>[a]</sup> Stephen C. Ratvasky,<sup>[b]</sup> Jingzhi Pu,<sup>[a]</sup> and Partha Basu\*<sup>[a]</sup>

---

[a] Dr. S. A. Dille, Mr. K. J. Colston, Dr. J. Pu, and Dr. P. Basu  
Department of Chemistry and Chemical Biology  
Indiana University – Purdue University Indianapolis  
Indianapolis, IN, 46202, USA  
E-mail: basup@iupui.edu

[b] Mr S. C. Ratvasky  
Department of Chemistry and Biochemistry  
Duquesne University  
Pittsburgh, PA, 15282, USA

## Experimental Section

*Materials.* All reagents and solvents were purchased from either Sigma Aldrich or Thermo Fisher Scientific and used as received without further purification. All work was carried out under an inert atmosphere either in a dry box or using Schlenk line techniques under argon.  $[\text{MoOCl}(\textit{i}\text{Pr}_2\text{Dt}^0)_2][\text{PF}_6]$ ,  $[\text{MoOCl}(\text{Me}_2\text{Dt}^0)_2][\text{PF}_6]$ <sup>12</sup>, *N,N'*-diisopropylpiperazine-2,3-dithione (*i*Pr<sub>2</sub>Dt<sup>0</sup>), and *N,N'*-dimethylpiperazine-2,3-dithione (Me<sub>2</sub>Dt<sup>0</sup>)<sup>60</sup> were synthesized following literature procedures. Multivariate regression analyses for Kamlet-Taft models were performed using Minitab 18 software.

*Physical Methods.* <sup>1</sup>H NMR spectra were recorded on either a Bruker 500 MHz Avance spectrometer or a Bruker 400 MHz Avance spectrometer in air-tight NMR tubes. <sup>31</sup>P NMR spectra were recorded on a Bruker 400 MHz Avance spectrometer in air-tight NMR tubes. Infrared spectroscopy (FTIR) was recorded using a Thermofisher Nicolet iS10 spectrometer at room temperature using a KBr pellet. Electronic absorbance spectra were collected on a Shimadzu UV-3600 Plus in an air tight quartz cuvette. Cyclic voltammetry was recorded on a Metrohm PGSTAT204 galvanostat/potentiostat. A Pt disk working electrode, Ag<sup>+</sup>/Ag reference electrode and Pt wire auxiliary electrode and tetrabutylammonium hexafluorophosphate supporting electrolyte were used. All voltammograms were referenced to the Fc<sup>+</sup>/Fc couple as an internal standard. All potentials are presented versus the Fc<sup>+</sup>/Fc couple, Mass spectra were collected using an Agilent Technologies 6520 Accurate Mass-QTOF LC/MS.

*Computational Methods.* All computational work was performed using *Gaussian 09* software package running on UNIX OS and visualized utilizing *GaussView 5.0.9*.

Calculations were done using the Lee-Yang-Parr nonlocal correlation functional<sup>61</sup> (B3LYP) and a combination of the LANL2DZ<sup>62</sup> effective core potential basis set for molybdenum and the 6-31G\*\* basis set for all other atoms. The crystal structure geometry was optimized using DFT to afford the geometry used for subsequent calculations. Atomic composition for molecular orbitals was determined using C-squared population analysis from single-point calculations with the program *QM-Forge*. The lowest 60 transition energies were generated using non-equilibrium TDDFT calculations with the polarizable continuum model (PCM) algorithm. PCM-TDDFT calculations were performed using acetonitrile as the solvent to match experimental conditions. Electron density difference maps (EDDMs) were generated using the *cubman* package in *Gaussian09*. *X-Ray Crystallography*. Single crystals were mounted using glass fiber and data collected using a Bruker SMART Apex II diffractometer with a graphite monochromator for Mo K $\alpha$  radiation (0.71073 Å). The absorption correction was performed using SADABS routine.<sup>63</sup> The structure solution and the refinement were done using SHELXS-97<sup>64</sup> and SHEXLX-2018 programs.<sup>65</sup> The X-ray data were collected at room temperature (296 K). Hydrogen atoms were placed at calculated positions and refined as riding atoms with isotropic displacement parameters. The methyl group on the toluene-2,3-dithiolene moiety of MoO(tdt)(*i*PrDt<sup>0</sup>) was refined as disordered over two moieties with different rotational orientations. The disorder extends to the other carbon and sulfur atoms of the toluene-2,3-dithiolene moiety, and they were included in the disorder modeling. The two moieties were restrained to have similar geometries (SAME command of Shelxl) and U<sub>ij</sub> components of ADPs for disordered atoms closer to each other than 2.0 Angstrom were restrained to be

similar. Subject to these conditions, the occupancy ratio refined to 0.517(5) to 0.483(5).

Details of the structure determination are listed in Table S1.

Table S1. Crystallographic Data for MoO(tdt)(<sup>i</sup>Pr<sub>2</sub>Dt<sup>0</sup>)

|                                            |                                                                  |
|--------------------------------------------|------------------------------------------------------------------|
| Formula                                    | C <sub>17</sub> H <sub>24</sub> MoN <sub>2</sub> OS <sub>4</sub> |
| Formula weight                             | 496.56                                                           |
| Temperature                                | 296 K                                                            |
| Color/shape                                | Purple/Block                                                     |
| Crystal system                             | Orthorhombic                                                     |
| Space group                                | Pbca                                                             |
| Unit cell dimensions                       | a=12.6981 (1) Å<br>b= 15.8799 (2) Å<br>c= 21.2754 (2) Å          |
| Volume ( Å <sup>3</sup> )                  | 4290.07(8)                                                       |
| Z, Formula unit/unit cell                  | 8                                                                |
| density (calculated)                       | 1.534 Mg m <sup>-3</sup>                                         |
| μ (mm <sup>-1</sup> )                      | 1.01                                                             |
| Diffractometer                             | Bruker Smart Apex II                                             |
| Radiation, graphite monochrome             | Mo Kα (λ=0.71073 Å)                                              |
| Crystal size                               | 0.20 x 0.11 x 0.08 mm                                            |
| Reflections collected/unique               | 70727/6665                                                       |
| Parameters/restraints                      | 314/292                                                          |
| R <sub>int</sub>                           | 0.054                                                            |
| Refinement method                          | Full-matrix least-squares on F <sup>2</sup>                      |
| Goodness-of-fit on F <sup>2</sup>          | 1.03                                                             |
| Final R indices [I>2σ(I)]                  | R=0.041 wR2=0.100                                                |
| Maximum residue peaks (e·Å <sup>-3</sup> ) | 0.53 and -0.44                                                   |

## Syntheses of Complexes

**MoO(bdt)(Me<sub>2</sub>Dt<sup>0</sup>) (1).** [MoOCl(Me<sub>2</sub>Dt<sup>0</sup>)<sub>2</sub>][PF<sub>6</sub>] (200 mg, 0.312 mmol) was dissolved in 9 mL of acetonitrile generating a dark blue solution. A solution of benzenedithiol (63 mg, 0.34 mmol) and triethylamine (69 mg, 0.68 mmol) in 1.5 mL of acetonitrile was added dropwise to the dark blue solution initiating an instantaneous color change to dark purple and the release of white vapor. The reaction mixture was stirred for one hour. The solution was filtered, and dark purple solid was collected. The crude product was washed with cold chloroform to obtain analytically pure product. Yield 56% (75 mg, 0.175 mmol). Calcd (Expt) for C<sub>12</sub>H<sub>14</sub>MoN<sub>2</sub>OS<sub>4</sub>: C, 33.80 (33.95); H, 3.31 (3.34); N, 6.33 (6.57). <sup>1</sup>H NMR (CD<sub>3</sub>CN): δ 3.77 (s, CH<sub>3</sub>, 6H), 3.89 (m, CH<sub>2</sub>, 2H), 4.18 (m, CH<sub>2</sub>, 2H), 7.10 (dd, *J*= 5.8 Hz, 3.2 Hz, aromatic, 2H), 7.65 (dd, *J*= 5.8 Hz, 3.2 Hz, aromatic, 2H). FTIR (KBr, cm<sup>-1</sup>): 1531 (vs, C(-N)S), 1354 (vs, C=S), 940 (s, Mo=O). UV-Vis (MeCN): λ<sub>max</sub> (ε, M<sup>-1</sup>cm<sup>-1</sup>) 380 nm (1610), 532 nm (4400).

**MoO(tdt)(Me<sub>2</sub>Dt<sup>0</sup>) (2).** [MoOCl(Me<sub>2</sub>Dt<sup>0</sup>)<sub>2</sub>][PF<sub>6</sub>] (200 mg, 0.312 mmol) was dissolved in 9 mL of acetonitrile generating a dark blue solution. A solution of toluene-3,4-dithiol (53 mg, 0.34 mmol) and triethylamine (69 mg, 0.68 mmol) in 1.5 mL of acetonitrile was added dropwise to the dark blue solution initiating an instantaneous color change to dark purple and the release of white vapor. The reaction mixture was stirred for one hour. The solution was filtered and dark purple solid was collected. The crude product was washed with cold chloroform to obtain analytically pure product. (79 mg, 0.164 mmol). 52% Calcd (Expt) for C<sub>13</sub>H<sub>16</sub>MoN<sub>2</sub>OS<sub>4</sub>: C, 35.45 (35.44); H, 3.66 (3.74); N, 6.36 (6.24). <sup>1</sup>H NMR (CD<sub>3</sub>CN): δ 2.34 (s, CH<sub>3</sub>, 3H), 3.76 (s, CH<sub>3</sub>, 6H), 3.86 (m, CH<sub>2</sub>, 2H), 4.14 (m,

CH<sub>2</sub>, 2H), 6.92 (d, *J*= 7.87 Hz, aromatic 1H), 7.47 (s, aromatic, 1H), 7.51 (d, *J*= 7.9 Hz, aromatic, 1H). FTIR (KBr, cm<sup>-1</sup>): 1534 (vs, C(-N)S), 1355 (vs, C=S), 929 (s, Mo=O).

UV-Vis (MeCN): λ<sub>max</sub> (ε, M<sup>-1</sup>cm<sup>-1</sup>) 380 nm (2320), 531 nm (6050).

**MoO(qdt)(Me<sub>2</sub>Dt<sup>0</sup>) (3).** [MoOCl(Me<sub>2</sub>Dt<sup>0</sup>)<sub>2</sub>][PF<sub>6</sub>] (200 mg, 0.312 mmol) was dissolved in 9 mL of acetonitrile generating a dark blue solution. A solution of quinoxalinedithiol (66 mg, 0.34 mmol) and triethylamine (69 mg, 0.68 mmol) in 1.5 mL of acetonitrile was added dropwise to the dark blue solution initiating an instantaneous color change to dark purple and the release of white vapor. The reaction mixture was stirred for one hour. The solution was filtered and dark purple solid was collected. The crude product was washed with cold chloroform to obtain analytically pure product. (20 mg, 0.0401 mmol). 11%  
Calcd (Expt) for C<sub>14</sub>H<sub>14</sub>MoN<sub>4</sub>OS<sub>4</sub> + H<sub>2</sub>O: C, 33.87(34.21); H, 3.25(2.82); N, 11.28 11.84).  
<sup>1</sup>H NMR (CD<sub>3</sub>CN): δ 3.84 (s, CH<sub>3</sub>, 6H), 4.00 (q, *J*= 8.2 Hz, 7.0 Hz, CH<sub>2</sub>, 2H), 4.21 (q, *J*= 7.0 Hz, 6.4 Hz, CH<sub>2</sub>, 2H), 7.63 (dd, *J*= 6.4 Hz, 3.4 Hz, aromatic, 2H), 7.93 (dd, *J*= 6.4 Hz, 3.4 Hz, aromatic, 2H). FTIR (KBr, cm<sup>-1</sup>): 1524 (vs, C(-N)S), 1350 (vs, C=S), 955 (s, Mo=O). UV-Vis (MeCN): λ<sub>max</sub> (ε, M<sup>-1</sup>cm<sup>-1</sup>) 410 nm (6110), 548 nm (7450).

**MoO(bdtCl<sub>2</sub>)(Me<sub>2</sub>Dt<sup>0</sup>) (4).** [MoOCl(Me<sub>2</sub>Dt<sup>0</sup>)<sub>2</sub>][PF<sub>6</sub>] (200 mg, 0.312 mmol) was dissolved in 9 mL of acetonitrile generating a dark blue solution. A solution of 3,6-dichloro-1,2-benzenedithiol (72 mg, 0.34 mmol) and triethylamine (69 mg, 0.68 mmol) in 1.5 mL of acetonitrile was added dropwise to the dark blue solution initiating an instantaneous color change to dark purple. The reaction mixture was stirred for thirty minutes. The solution was filtered and dark purple solid was collected. The crude product was washed with cold chloroform to obtain analytically pure product. Yield 42% (65 mg,

0.132 mmol). Calcd (Expt) for  $C_{12}H_{12}Cl_2MoN_2OS_4$ : C, 29.10 (29.35); H, 2.44 (2.50); N, 5.66 (5.69).  $^1H$  NMR ( $CD_3CN$ ):  $\delta$  3.81 (s,  $CH_3$ , 6H), 4.10 (m,  $CH_2$ , 2H), 4.20 (m,  $CH_2$ , 2H), 7.12 (s, aromatic 2H). FTIR (KBr,  $cm^{-1}$ ): 1527 (vs, C(-N)S), 1353 (vs, C=S), 926 (s, Mo=O). Electronic spectrum, UV-Vis (MeCN):  $\lambda_{max}$  ( $\epsilon$ ,  $M^{-1}cm^{-1}$ ) 385 nm (2050), 531 nm (4460).

**MoO(bdt)( $iPr_2Dt^0$ ) (5).**  $[MoOCl(iPr_2Dt^0)_2][PF_6]$  (200 mg, 0.26 mmol) was dissolved in 10.5 mL of acetonitrile generating a dark blue solution. A solution of benzenedithiol (49 mg, 0.34 mmol) and triethylamine (59 mg, 0.58 mmol) in 1.5 mL of acetonitrile was added dropwise to the dark blue solution initiating an instantaneous color change to dark purple. The reaction mixture was stirred for one hour. The solution was filtered, and dark purple solid was collected. Free  $iPr_2Dt^0$  ligand was present in the crude product. To remove the free ligand, the crude product (80 mmol) was dissolved in 7.5 mL of  $CH_3Cl$ .  $MoCl_5$  (10 mg, 0.037 mmol) was dissolved in 3 mL of MeOH generating HCl gas. The  $MoCl_5$  was stirred until the cessation of the HCl gas was observed resulting in a green solution. The methanolic solution was added dropwise to the chloroform solution of the crude  $MoO(bdt)(iPr_2Dt^0)$ . The mixture was stirred for 1.5 hours and filtered. A dark purple filtrate of analytically pure complex was collected. Yield 41% (52 mg, 0.107 mmol) Calcd (Expt) for  $C_{16}H_{22}MoN_2OS_4$ : C, 39.82 (40.24); H, 4.60 (4.51); N, 5.81 (5.54).  $^1H$  NMR ( $CD_3CN$ ):  $\delta$  1.28 (d,  $J= 6.7$  Hz,  $CH_3$ , 6H), 1.43 (d,  $J= 6.7$  Hz,  $CH_3$ , 6H), 3.74 (m,  $CH_2$ , 2H), 4.02 (m,  $CH_2$ , 2H), 5.23 (h,  $J= 6.7$  Hz, CH, 2H), 7.10 (dd,  $J= 5.8$  Hz, 3.2 Hz, aromatic, 2H), 7.65 (dd,  $J= 5.8$  Hz, 3.3 Hz, aromatic, 2H) FTIR (KBr,  $cm^{-1}$ ): 1501 (vs, C(-N)S), 1350 (vs, C=S), 931 (s, Mo=O). Electronic spectrum, UV-Vis (MeCN):  $\lambda_{max}$  ( $\epsilon$ ,  $M^{-1}cm^{-1}$ ) 380 (2880), 529 nm (6900).

**MoO(tdt)(<sup>i</sup>Pr<sub>2</sub>Dt<sup>0</sup>) (6).** [MoOCl(<sup>i</sup>Pr<sub>2</sub>Dt<sup>0</sup>)<sub>2</sub>][PF<sub>6</sub>] (200 mg, 0.26 mmol) was dissolved in 9 mL of acetonitrile generating a dark blue solution. A solution of toluene-3,4-dithiol (0.45 g, 0.00029 moles) and triethylamine (59 mg, 0.58 mmol) in 1.5 mL of acetonitrile was added dropwise to the dark blue solution initiating an instantaneous color change to dark purple. The reaction mixture was stirred for one hour. The solution was filtered and dark purple solid was collected. The crude product was washed with cold chloroform resulting in analytically pure product. Yield 58% (77 mg, 0.155 mmol). Calcd (Expt) for C<sub>17</sub>H<sub>24</sub>MoN<sub>2</sub>OS<sub>4</sub>: C, 41.12 (41.04); H, 4.87 (4.76); N, 5.64 (5.52). <sup>1</sup>H NMR (CD<sub>2</sub>Cl<sub>2</sub>): δ 1.24 (d, CH<sub>3</sub>, *J*= 6.9 Hz, 6H), 1.43 (d, *J*= 6.8 Hz, CH<sub>3</sub>, 6H), 2.34 (s, CH<sub>3</sub>, 3H), 3.62 (m, CH<sub>2</sub>, 2H), 3.88 (m, CH<sub>2</sub>, 2H), 5.22 (h, *J*= 6.7 Hz, CH, 2H), 6.93 (d, *J*=8.1 Hz, aromatic H), 7.47 (s, aromatic, H), 7.51 (d, *J*= 7.9 Hz, aromatic, H). FTIR (KBr, cm<sup>-1</sup>): 1501 (vs, C(-N)S), 1350 (vs, C=S), 931 (s, Mo=O). UV-Vis (MeCN): λ<sub>max</sub> (ε, M<sup>-1</sup>cm<sup>-1</sup>) 380 (2880) 533 nm (7500).

**MoO(qdt)(<sup>i</sup>Pr<sub>2</sub>Dt<sup>0</sup>) (7).** [MoOCl(<sup>i</sup>Pr<sub>2</sub>Dt<sup>0</sup>)<sub>2</sub>][PF<sub>6</sub>] (200 mg, 0.26 mmol) was dissolved in 13.5 mL of acetonitrile generating a dark blue solution. A solution of quinoxalinedithiol (56 mg, 0.29 mmol) and triethylamine (59 mg, 0.58 mmol) in 4.5 mL of methanol was added dropwise to the dark blue solution initiating an instantaneous color change to dark purple. The reaction mixture was stirred for one hour. The solution was filtered and green solid was collected. The green solid was washed with CH<sub>3</sub>Cl to collect a dark purple filtrate. The solvent was dried en vacuo to obtain analytically pure complex. Yield 34% (49 mg, 0.091 mmol). Calcd (Expt) for C<sub>18</sub>H<sub>22</sub>MoN<sub>4</sub>OS<sub>4</sub> + CH<sub>3</sub>Cl: C, 40.27 (39.77): H, 4.63 (4.52); N, 9.89 (9.16). <sup>1</sup>H NMR (CD<sub>3</sub>CN): δ 1.27(d, *J*= 6.7 Hz, CH<sub>3</sub>, 6H), 1.41 (d, *J*= 6.7 Hz, CH<sub>3</sub>, 6H), 3.63 (m, CH<sub>2</sub>, 2H), 3.87 (m, CH<sub>2</sub>, 2H), 5.25 (h, *J*= 6.7 Hz, CH,



2H), 7.54 (dd,  $J=6.4$  Hz, 3.4 Hz, aromatic, 2H), 7.98 (dd,  $J=6.3$  Hz, 3.4 Hz, aromatic, 2H). FTIR (KBr,  $\text{cm}^{-1}$ ): 1491 (vs, C(-N)S), 1351 (vs, C=S), 950 (s, Mo=O). UV-Vis (MeCN):  $\lambda_{\text{max}}$  ( $\epsilon$ ,  $\text{M}^{-1}\text{cm}^{-1}$ ) 400 nm (8240), 543 nm (7070).

**MoO(bdtCl<sub>2</sub>)(<sup>*i*</sup>Pr<sub>2</sub>Dt<sup>0</sup>) (8).** [MoOCl(<sup>*i*</sup>Pr<sub>2</sub>Dt<sup>0</sup>)<sub>2</sub>][PF<sub>6</sub>] (200 mg, 0.26 mmol) was dissolved in 13.5 mL of acetonitrile generating a dark blue solution. A solution of 3,6-dichloro-1,2-benzenedithiol (61 mg, 0.29 mmol) and triethylamine (59 mg, 0.58 mmol) in 1.5 mL of acetonitrile was added dropwise to the dark blue solution initiating an instantaneous color change to dark purple. The reaction mixture was stirred for 15 minutes. The solution was filtered and dark purple solid was collected. The crude product was washed with cold chloroform to obtain analytically pure complex. Yield: 68% (100 mg, 0.181 mmol).

Calcd (Expt) for C<sub>16</sub>H<sub>20</sub>Cl<sub>2</sub>MoN<sub>2</sub>OS<sub>4</sub>: C, 34.85 (34.65); H, 3.66 (3.67); N, 5.08 (5.08). <sup>1</sup>H NMR (CD<sub>3</sub>CN):  $\delta$ 1.31 (d,  $J=6.7$  Hz, CH<sub>3</sub>, 6H), 1.45 (d,  $J=6.7$  Hz, CH<sub>3</sub>, 6H), 3.71 (m, CH<sub>2</sub>, 2H), 4.01 (m, CH<sub>2</sub>, 2H), 5.28 (h,  $J=6.7$  Hz, CH, 2H), 7.23 (s, aromatic 2H). FTIR (KBr,  $\text{cm}^{-1}$ ): 1507 (vs, C(-N)S), 1356 (vs, C=S), 939 (s, Mo=O). UV-Vis (MeCN):  $\lambda_{\text{max}}$  ( $\epsilon$ ,  $\text{M}^{-1}\text{cm}^{-1}$ ) 390 nm (4070), 530 nm (9400).

## Electrochemistry

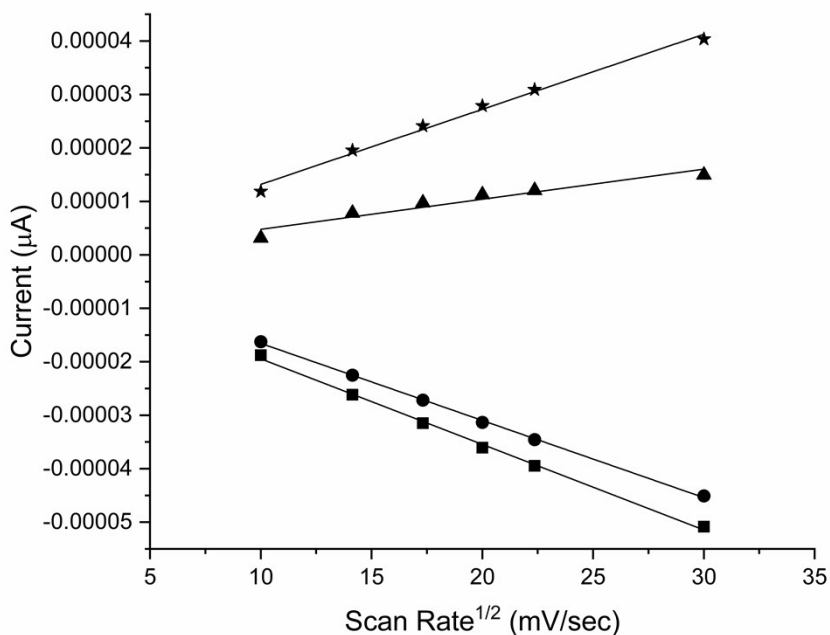

Figure S1. A plot showing the linearity of the peak current ( $i_p$ ) versus the square root of the scan rate ( $v$ ) for complex **6** suggesting diffusion-controlled processes. Fit of the equations are given below.

### Oxidation

★  $i_p = 1.40E-6 (+/- 6.36E-8) n^{3/2} AD^{1/2} C^b - 8.71E-7 (+/- 1.27E-6)$ ;  $r^2 = 0.99$

▲  $i_p = 5.63E-7 (+/- 7.84E-8) n^{3/2} AD^{1/2} C^b - 8.56E-7 (+/- 1.57E-6)$ ;  $r^2 = 0.93$

### Reduction

●  $i_p = -1.44E-6 (+/- 1.91E-8) n^{3/2} AD^{1/2} C^b - 2.12E-6 (+/- 3.82E-7)$ ;  $r^2 = 0.99$

■  $i_p = -1.60E-6 (+/- 3.78E-8) n^{3/2} AD^{1/2} C^b - 3.44E-6 (+/- 7.56E-7)$ ;  $r^2 = 0.99$

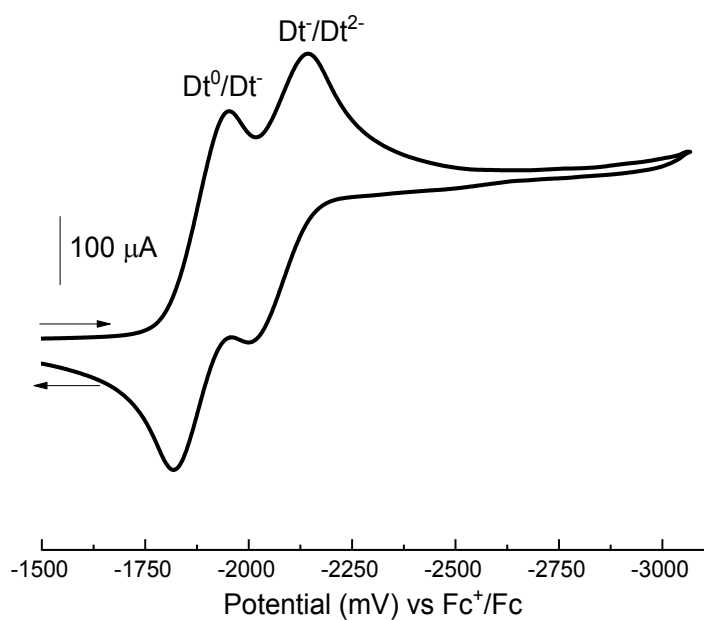

Figure S2 Cyclic voltammogram of  $i\text{Pr}_2\text{Dt}^0$ . Scan rate,  $100 \text{ mV s}^{-1}$ ; solvent, acetonitrile; temperature,  $25^\circ\text{C}$ ; Glassy carbon working electrode,  $\text{Ag}/\text{Ag}^+$  reference electrode, and a Pt-wire auxiliary electrode; supporting electrolyte,  $t\text{BuNPF}_6$ . Potentials referenced internally to  $\text{Fc}^+/\text{Fc}$  couple.

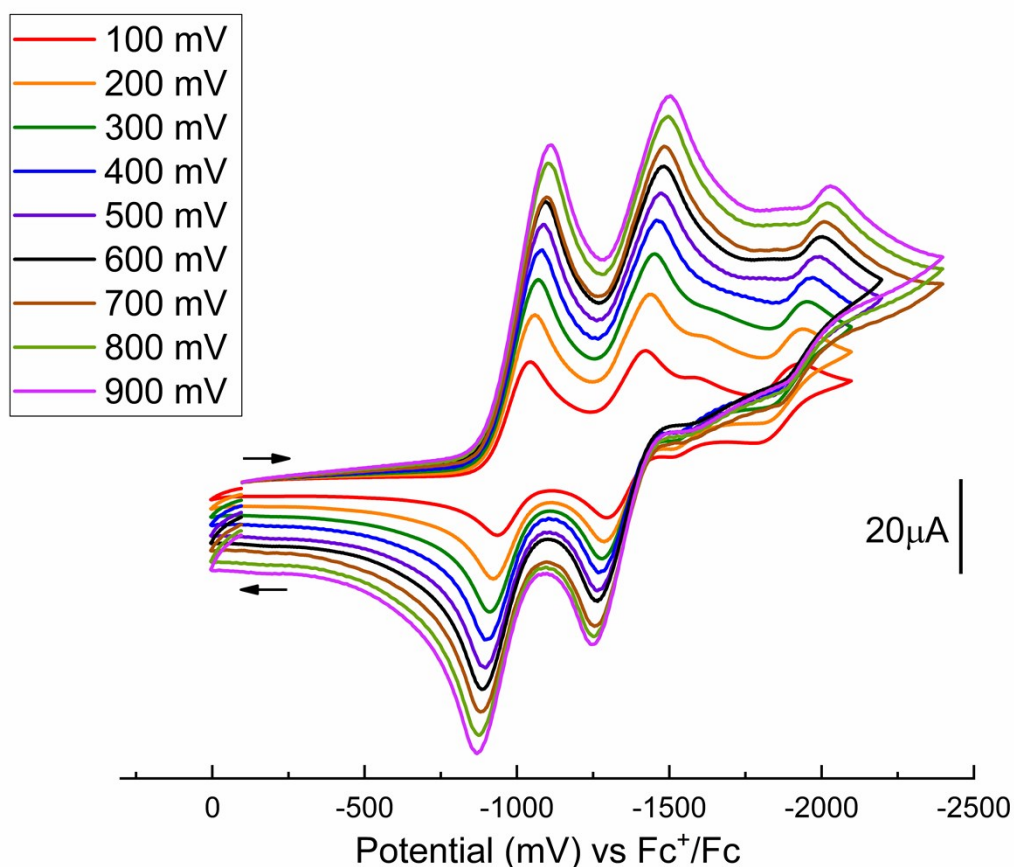

Figure S3. Cyclic voltammogram of  $\text{Zn}(\text{mnt})(i\text{Pr}_2\text{Dt}^0)$  at varying scan rates ; solvent, acetonitrile; temperature,  $25^\circ\text{C}$ ; Platinum disk working electrode,  $\text{Ag}/\text{Ag}^+$  reference electrode, and a Pt-wire auxiliary electrode; supporting electrolyte,  $\text{Bu}_4\text{NPF}_6$ . Potentials referenced internally to  $\text{Fc}^+/\text{Fc}$  couple. The two poorly defined couples are due to potential dissociation of the  $i\text{Pr}_2\text{Dt}^0$  ligand. Support for this suggestion comes from multiple scan rate experiment. As scan rate increases, the couple at  $E_{1/2} = -1556 \text{ mV}$  ( $\Delta E_p = 90 \text{ mV}$ ) is no longer observed. The peak height of the two reversible couples attributed to the coordinated ligand increase with increasing scan rate whereas the peak heights of the couple at  $E_{1/2} = -1556 \text{ mV}$  ( $\Delta E_p = 90 \text{ mV}$ ) does not increase. At a scan rate of  $100 \text{ mV/sec}$  the peak heights  $-1923 \text{ mV}$  is  $\sim 50\%$  and at a scan rate of  $900 \text{ mV/sec}$  the peak height at  $-1923 \text{ mV}$  is  $\sim 8\%$  of the peak height at  $-1601 \text{ mV}$ . Dissociation of the ligand is a slow electron process and the concentration of free ligand can be decreased by increasing the scan rate.

## Electronic Spectra

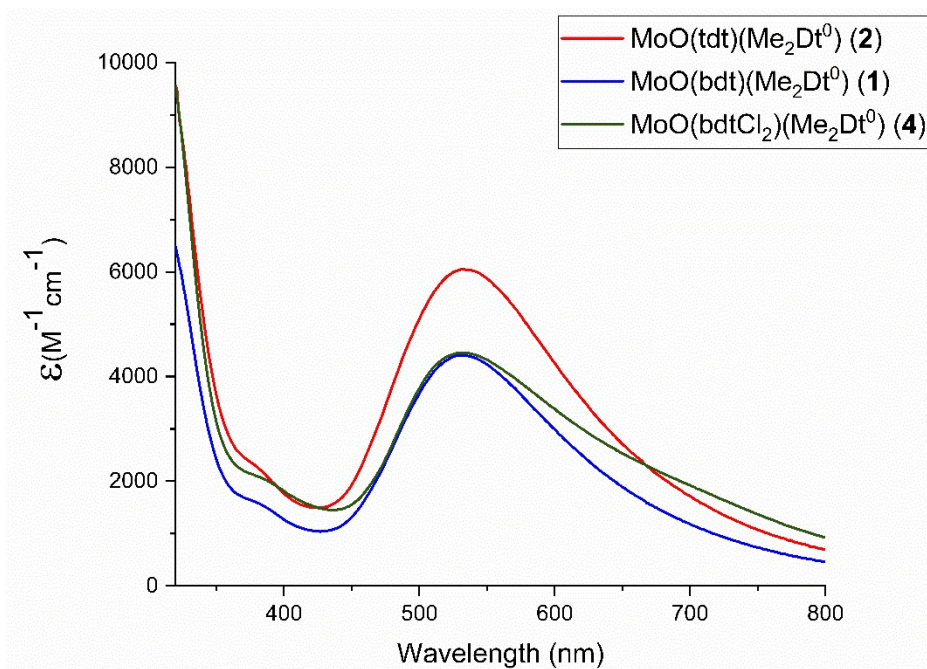

Figure S4. Absorbance spectra for complexes possessing the  $\text{Me}_2\text{Dt}^0$  dithione ligand in acetonitrile.

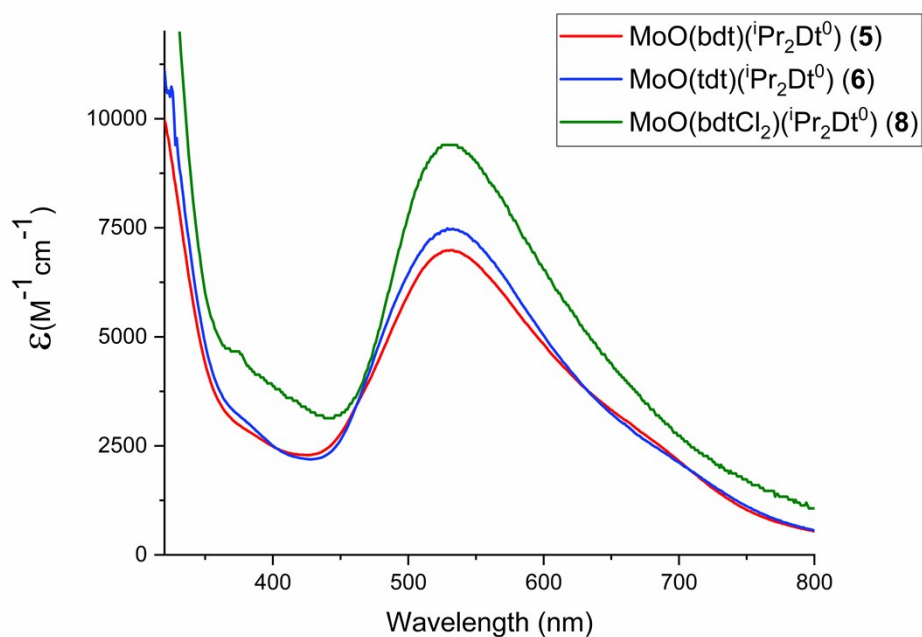

Figure S5. Absorbance spectra for complexes possessing the  $^i\text{Pr}_2\text{Dt}^0$  dithione ligand in acetonitrile.

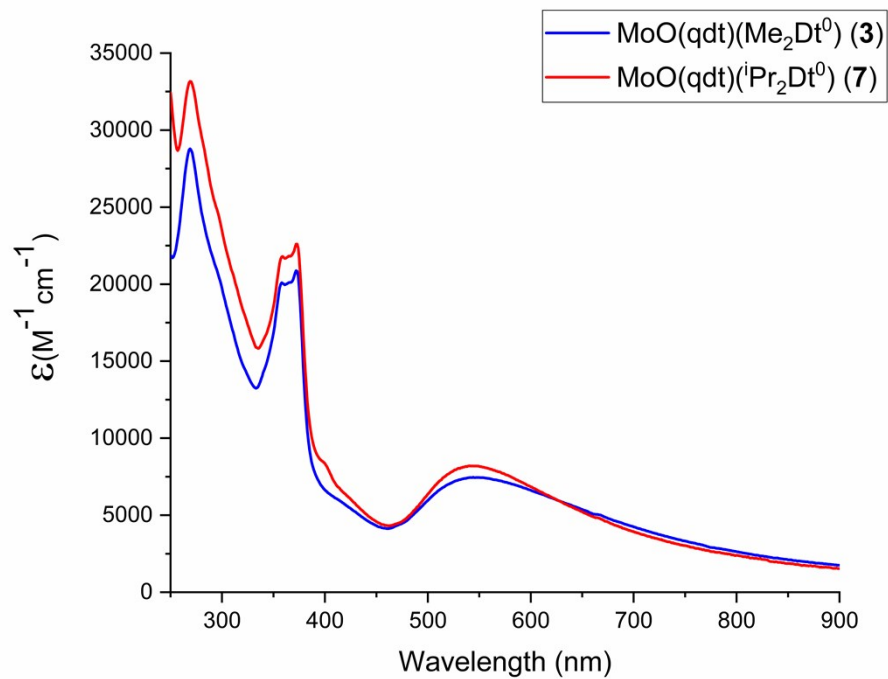

Figure S6. Absorbance spectra of **3** and **7** in acetonitrile.

## Solvatochromic Effect

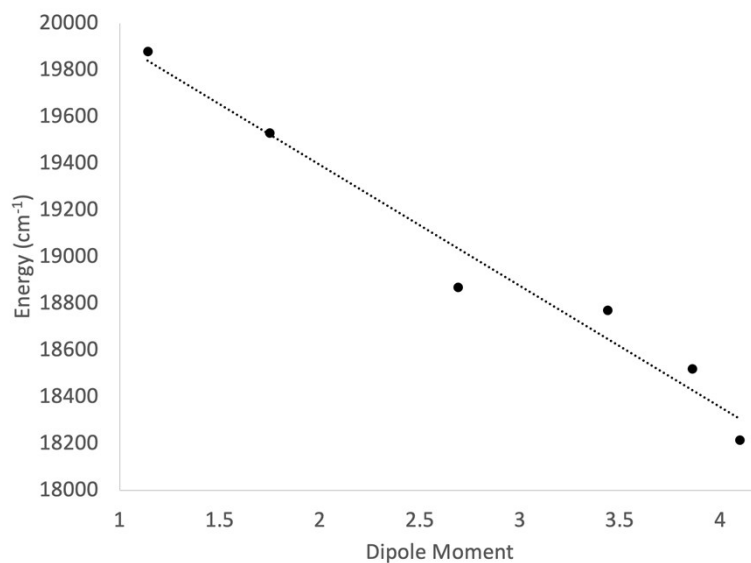

Figure S7. Linear correlation between dipole moment ( $\mu$ ) and the energy of the LL'CT of MoO(bdt)(Me<sub>2</sub>Dt<sup>0</sup>).  
Equation of fit:  $E = -518.86\mu + 20432$   $R^2 = 0.97$

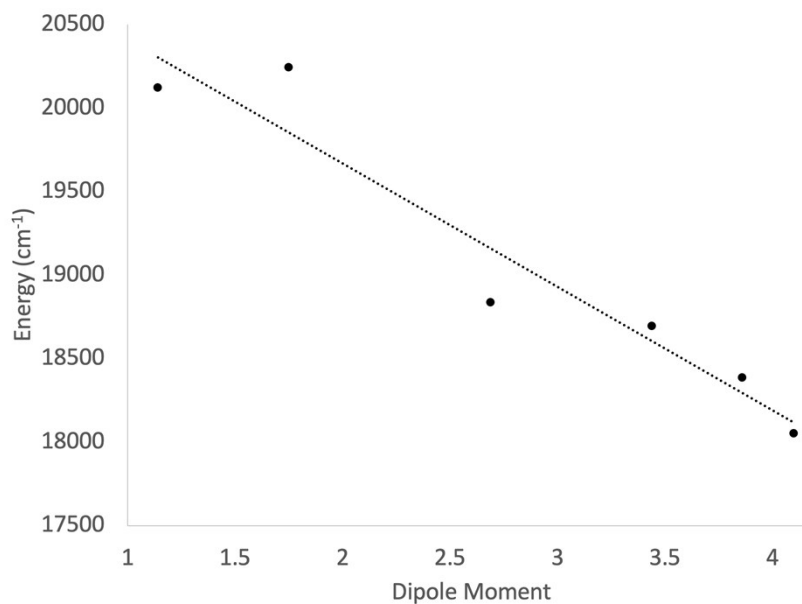

Figure S8. Linear correlation between dipole moment ( $\mu$ ) and the energy of the LL'CT of MoO(tdt)(Me<sub>2</sub>Dt<sup>0</sup>). Equation of fit:  $E = -739.58\mu + 21146$   $R^2 = 0.93$



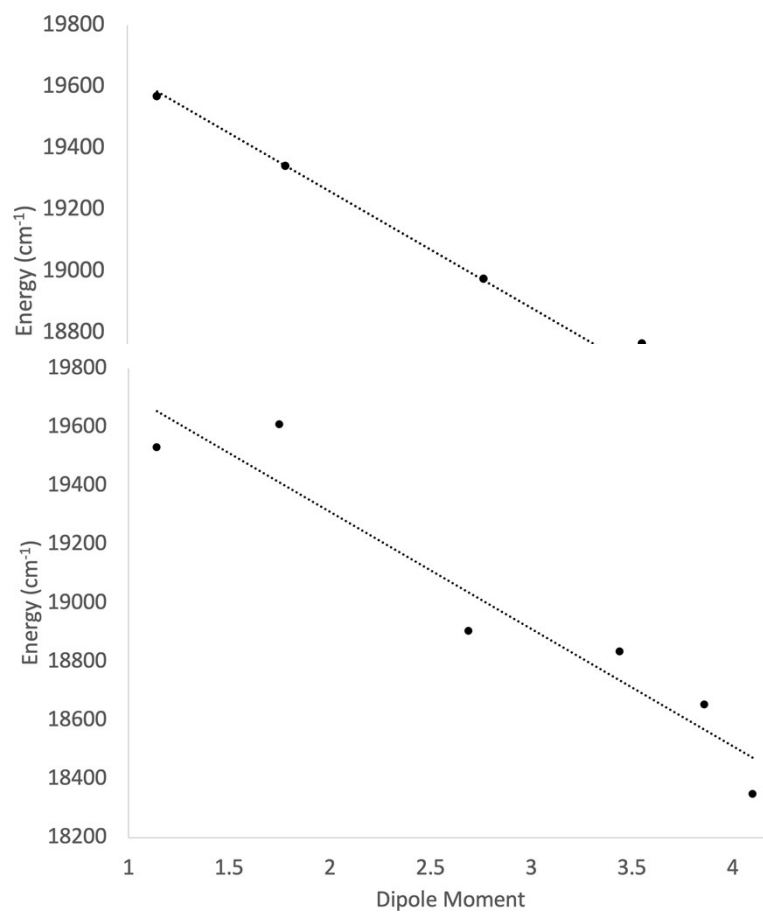

Figure S10. Linear correlation between dipole moment ( $\mu$ ) and the energy of the LL'CT of MoO(bdt)( $i\text{Pr}_2\text{Dt}^0$ ). Equation of fit:  $E = -399.03 \mu + 20108$   $R^2 = 0.92$

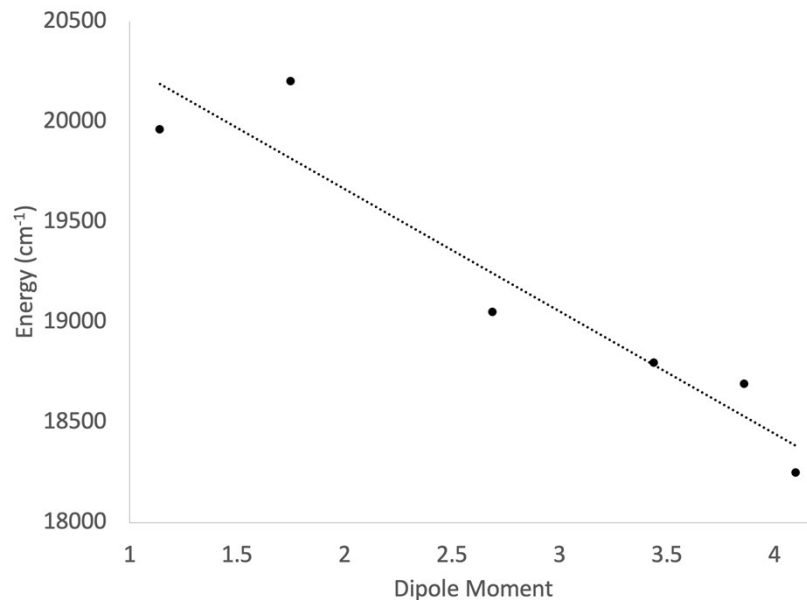

Figure S11. Linear correlation between dipole moment ( $\mu$ ) and the energy of the LL'CT of MoO(tdt)( $i\text{Pr}_2\text{Dt}^0$ ). Equation of fit:  $E = -610.17 \mu + 20884$   $R^2 = 0.90$

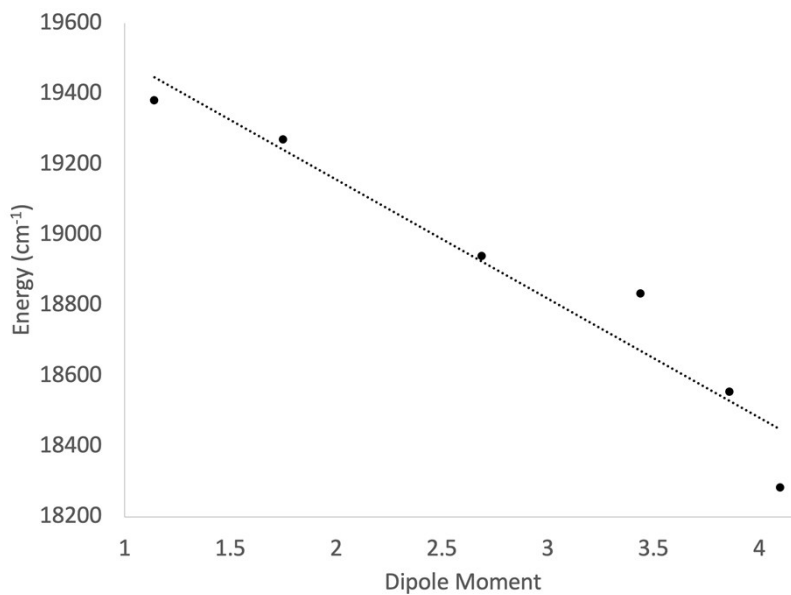

Figure S12. Linear correlation between dipole moment ( $\mu$ ) and the energy of the LL'CT of MoO(bdtCl<sub>2</sub>)( $i\text{Pr}_2\text{Dt}^0$ ). Equation of fit:  $E = -338.3 \mu + 19833$   $R^2 = 0.93$

Table S2. Composition of the molecular orbitals in **6**.

| Orbital     | E, eV        | Mo           | Mo(d)        | O           | tdt          | S <sup>tdt</sup> | <sup>i</sup> Pr <sub>2</sub> Dt <sup>0</sup> | S <sup>Dt<sup>0</sup></sup> |
|-------------|--------------|--------------|--------------|-------------|--------------|------------------|----------------------------------------------|-----------------------------|
| L+2         | -1.05        | 48.47        | 39.81        | 10.24       | 17.89        | 16.34            | 23.40                                        | 17.21                       |
| L+1         | -1.41        | 42.55        | 35.40        | 9.71        | 9.32         | 7.67             | 38.42                                        | 14.78                       |
| <b>LUMO</b> | <b>-2.81</b> | <b>25.82</b> | <b>25.37</b> | <b>1.70</b> | <b>3.08</b>  | <b>1.56</b>      | <b>69.40</b>                                 | <b>22.97</b>                |
| <b>HOMO</b> | <b>-4.91</b> | <b>7.46</b>  | <b>4.16</b>  | <b>5.63</b> | <b>82.26</b> | <b>39.79</b>     | <b>4.66</b>                                  | <b>1.60</b>                 |
| H-1         | -5.33        | 1.36         | 1.05         | 1.99        | 87.81        | 49.26            | 8.84                                         | 6.62                        |
| H-2         | -5.64        | 46.93        | 44.00        | 0.11        | 13.71        | 8.27             | 39.25                                        | 6.25                        |

Table S3. Dt<sup>0</sup> fold angles (°) of **2**, **5**, **6**, **7**, and **8** calculated from gas phase optimizations. Compounds without crystallographic data were generated by editing **6** in *GaussView6.0* to change Dt<sup>2-</sup> and Dt<sup>0</sup> substituents.

| Complex                                                                               | Dt <sup>0</sup> Fold Angle (°) |
|---------------------------------------------------------------------------------------|--------------------------------|
| MoO(tdt)(Me <sub>2</sub> Dt <sup>0</sup> ) ( <b>2</b> )                               | 65.93                          |
| MoO(bdt)( <sup>i</sup> Pr <sub>2</sub> Dt <sup>0</sup> ) ( <b>5</b> )                 | 70.53                          |
| MoO(tdt)( <sup>i</sup> Pr <sub>2</sub> Dt <sup>0</sup> ) ( <b>6</b> )                 | 70.47                          |
| MoO(bdtCl <sub>2</sub> )( <sup>i</sup> Pr <sub>2</sub> Dt <sup>0</sup> ) ( <b>7</b> ) | 69.85                          |
| MoO(qdt)( <sup>i</sup> Pr <sub>2</sub> Dt <sup>0</sup> ) ( <b>8</b> )                 | 69.58                          |

Table S4. Equation of the fit for the multivariate regression using the Kamlet-Taft model.

| Complex                                                                               | Equation of Fit                  |
|---------------------------------------------------------------------------------------|----------------------------------|
| MoO(bdt)(Me <sub>2</sub> Dt <sup>0</sup> ) ( <b>1</b> )                               | 23726+1514 π*– 1675 α - 9347 β   |
| MoO(tdt)( Me <sub>2</sub> Dt <sup>0</sup> ) ( <b>2</b> )                              | 26752+1785 π*– 27025 α - 1406 β  |
| MoO(bdtCl <sub>2</sub> )( Me <sub>2</sub> Dt <sup>0</sup> )( <b>4</b> )               | 20777-3031 π*+ 425.9 α + 606 β   |
| MoO(bdt)( <sup>i</sup> Pr <sub>2</sub> Dt <sup>0</sup> ) ( <b>5</b> )                 | 23041+366 π*– 12720 α - 6794 β   |
| MoO(tdt)( <sup>i</sup> Pr <sub>2</sub> Dt <sup>0</sup> ) ( <b>6</b> )                 | 25891+1336 π*– 23442 α - 11962 β |
| MoO(bdtCl <sub>2</sub> )( <sup>i</sup> Pr <sub>2</sub> Dt <sup>0</sup> ) ( <b>8</b> ) | 21829-104 π*– 7887 α - 4563 β    |

Table S5. Correlation coefficients of peak maxima fit to the Kamlet-Taft model.

| Complex                                                                      | Dipole Moment<br>$R^2$ | Kamlet-Taft<br>$R^2$ |
|------------------------------------------------------------------------------|------------------------|----------------------|
| MoO(bdt)(Me <sub>2</sub> Dt <sup>0</sup> ) (1)                               | 0.97                   | 0.98                 |
| MoO(tdt)(Me <sub>2</sub> Dt <sup>0</sup> ) (2)                               | 0.93                   | 0.94                 |
| MoO(bdtCl <sub>2</sub> )(Me <sub>2</sub> Dt <sup>0</sup> ) (4)               | 0.98                   | 0.98                 |
| MoO(bdt)( <sup>i</sup> Pr <sub>2</sub> Dt <sub>0</sub> ) (5)                 | 0.92                   | 0.96                 |
| MoO(tdt)( <sup>i</sup> Pr <sub>2</sub> Dt <sub>0</sub> ) (6)                 | 0.90                   | 0.97                 |
| MoO(bdtCl <sub>2</sub> )( <sup>i</sup> Pr <sub>2</sub> Dt <sup>0</sup> ) (8) | 0.93                   | 0.99                 |

### Theoretical Calculations

Charge = 0 Multiplicity = 1

|    |        |        |        |
|----|--------|--------|--------|
| Mo | -0.432 | 0.003  | 0.128  |
| C  | -3.633 | -1.017 | 0.206  |
| N  | 3.519  | -1.183 | -0.197 |
| S  | -2.028 | -1.772 | 0.311  |
| O  | -0.02  | 0.464  | 1.72   |
| S  | -2.327 | 1.303  | -0.534 |
| C  | -3.764 | 0.33   | -0.151 |
| N  | 2.922  | 1.551  | 0.052  |
| C  | -5.04  | 0.908  | -0.239 |
| H  | -5.126 | 1.955  | -0.517 |
| S  | 0.967  | -1.799 | -0.81  |
| C  | -6.191 | 0.164  | 0.024  |
| S  | 0.729  | 1.37   | -1.528 |
| C  | -6.045 | -1.188 | 0.377  |
| C  | 3.845  | -2.633 | -0.168 |
| H  | 3.062  | -3.121 | -0.75  |
| C  | -4.786 | -1.772 | 0.468  |
| H  | -4.687 | -2.819 | 0.742  |
| C  | 3.953  | 3.772  | -0.375 |
| H  | 3.752  | 4.848  | -0.362 |
| H  | 4.174  | 3.479  | -1.405 |
| H  | 4.849  | 3.604  | 0.234  |

|   |        |        |        |
|---|--------|--------|--------|
| C | 3.784  | -3.177 | 1.265  |
| H | 2.8    | -2.998 | 1.705  |
| H | 4.545  | -2.722 | 1.909  |
| H | 3.964  | -4.256 | 1.257  |
| C | 4.544  | -0.243 | 0.263  |
| H | 5.153  | 0.109  | -0.58  |
| H | 5.203  | -0.763 | 0.962  |
| C | 2.73   | 3.02   | 0.162  |
| H | 1.882  | 3.246  | -0.483 |
| C | 2.049  | 0.731  | -0.597 |
| C | 2.355  | 3.419  | 1.596  |
| H | 2.097  | 4.482  | 1.619  |
| H | 3.183  | 3.269  | 2.299  |
| H | 1.49   | 2.846  | 1.943  |
| C | 3.878  | 0.927  | 0.964  |
| H | 3.373  | 0.586  | 1.878  |
| H | 4.633  | 1.663  | 1.243  |
| C | 5.184  | -2.907 | -0.862 |
| H | 5.193  | -2.502 | -1.878 |
| H | 5.335  | -3.989 | -0.927 |
| H | 6.036  | -2.493 | -0.314 |
| C | 2.296  | -0.727 | -0.549 |
| C | -7.562 | 0.795  | -0.059 |
| H | -8.049 | 0.825  | 0.924  |
| H | -8.224 | 0.23   | -0.726 |
| H | -7.508 | 1.821  | -0.433 |
| H | -6.928 | -1.788 | 0.585  |

Excitation energies and oscillator strengths:

Excited State 1: Singlet-A 1.9465 eV 636.95 nm f=0.0115 <S\*\*2>=0.000  
 113 ->114 0.70049

This state for optimization and/or second-order correction.

Total Energy, E(TD-HF/TD-KS) = -2507.39909459

Copying the excited state density for this state as the 1-particle RhoCI density.

Excited State 2: Singlet-A 2.3850 eV 519.84 nm f=0.0091 <S\*\*2>=0.000  
 111 ->114 0.62758  
 112 ->114 -0.30273

Excited State 3: Singlet-A 2.4944 eV 497.06 nm f=0.1752 <S\*\*2>=0.000  
 111 ->114 0.30744  
 112 ->114 0.56780  
 112 ->115 -0.14893  
 112 ->116 -0.17355

Excited State 4: Singlet-A 2.8406 eV 436.47 nm f=0.0146 <S\*\*2>=0.000  
112 ->114 0.10439  
112 ->115 0.56066  
112 ->116 -0.15536  
113 ->115 -0.33777

Excited State 5: Singlet-A 3.0308 eV 409.08 nm f=0.0034 <S\*\*2>=0.000  
112 ->115 0.33978  
113 ->115 0.59747

Excited State 6: Singlet-A 3.0657 eV 404.43 nm f=0.0046 <S\*\*2>=0.000  
109 ->114 0.17121  
110 ->114 0.64063  
112 ->116 0.18533

Excited State 7: Singlet-A 3.2085 eV 386.43 nm f=0.1255 <S\*\*2>=0.000  
110 ->114 -0.18069  
112 ->114 0.22461  
112 ->115 0.11939  
112 ->116 0.54462  
113 ->116 -0.25749

Excited State 8: Singlet-A 3.3153 eV 373.98 nm f=0.0232 <S\*\*2>=0.000  
111 ->115 0.15594  
112 ->116 0.28653  
113 ->116 0.61029

Excited State 9: Singlet-A 3.4525 eV 359.11 nm f=0.0056 <S\*\*2>=0.000  
109 ->114 0.12833  
112 ->117 0.55843  
112 ->118 0.24788  
113 ->117 -0.26725

Excited State 10: Singlet-A 3.4706 eV 357.25 nm f=0.0032 <S\*\*2>=0.000  
109 ->114 0.66222  
110 ->114 -0.17874

Excited State 11: Singlet-A 3.5612 eV 348.15 nm f=0.0651 <S\*\*2>=0.000  
111 ->115 0.64750  
113 ->116 -0.10787  
113 ->117 0.14787

Excited State 12: Singlet-A 3.6969 eV 335.37 nm f=0.0319 <S\*\*2>=0.000  
111 ->115 -0.11913  
111 ->116 -0.18849  
112 ->117 0.24848

|                   |           |           |           |          |              |
|-------------------|-----------|-----------|-----------|----------|--------------|
| 112 ->118         | 0.11893   |           |           |          |              |
| 113 ->117         | 0.56256   |           |           |          |              |
| 113 ->118         | 0.17253   |           |           |          |              |
| Excited State 13: | Singlet-A | 3.8104 eV | 325.39 nm | f=0.0194 | <S**2>=0.000 |
| 105 ->114         | -0.17815  |           |           |          |              |
| 107 ->114         | 0.53624   |           |           |          |              |
| 111 ->116         | 0.37740   |           |           |          |              |
| Excited State 14: | Singlet-A | 3.8181 eV | 324.73 nm | f=0.0181 | <S**2>=0.000 |
| 105 ->114         | 0.12181   |           |           |          |              |
| 107 ->114         | -0.36016  |           |           |          |              |
| 111 ->116         | 0.53083   |           |           |          |              |
| 113 ->117         | 0.14213   |           |           |          |              |
| 113 ->118         | 0.16120   |           |           |          |              |
| Excited State 15: | Singlet-A | 3.9125 eV | 316.89 nm | f=0.0544 | <S**2>=0.000 |
| 108 ->114         | -0.10789  |           |           |          |              |
| 112 ->117         | -0.22713  |           |           |          |              |
| 112 ->118         | 0.50035   |           |           |          |              |
| 113 ->117         | 0.11114   |           |           |          |              |
| 113 ->118         | -0.32321  |           |           |          |              |
| Excited State 16: | Singlet-A | 3.9883 eV | 310.87 nm | f=0.0213 | <S**2>=0.000 |
| 106 ->114         | -0.31306  |           |           |          |              |
| 108 ->114         | 0.55191   |           |           |          |              |
| 110 ->115         | -0.16152  |           |           |          |              |
| 112 ->118         | 0.18408   |           |           |          |              |
| Excited State 17: | Singlet-A | 4.0079 eV | 309.35 nm | f=0.0178 | <S**2>=0.000 |
| 106 ->114         | 0.51169   |           |           |          |              |
| 108 ->114         | 0.39698   |           |           |          |              |
| 110 ->115         | 0.17722   |           |           |          |              |
| 112 ->118         | -0.10505  |           |           |          |              |
| Excited State 18: | Singlet-A | 4.0864 eV | 303.40 nm | f=0.0936 | <S**2>=0.000 |
| 106 ->114         | 0.13289   |           |           |          |              |
| 110 ->115         | 0.11047   |           |           |          |              |
| 111 ->117         | 0.11717   |           |           |          |              |
| 112 ->117         | -0.12638  |           |           |          |              |
| 112 ->118         | 0.27889   |           |           |          |              |
| 113 ->117         | -0.16113  |           |           |          |              |
| 113 ->118         | 0.52994   |           |           |          |              |
| Excited State 19: | Singlet-A | 4.1768 eV | 296.84 nm | f=0.0248 | <S**2>=0.000 |
| 111 ->117         | 0.65572   |           |           |          |              |

|                   |           |           |           |          |              |
|-------------------|-----------|-----------|-----------|----------|--------------|
| 111 ->118         | 0.12423   |           |           |          |              |
| Excited State 20: | Singlet-A | 4.2372 eV | 292.61 nm | f=0.0116 | <S**2>=0.000 |
| 104 ->114         | 0.21900   |           |           |          |              |
| 106 ->114         | -0.20315  |           |           |          |              |
| 110 ->115         | 0.59258   |           |           |          |              |
| Excited State 21: | Singlet-A | 4.3018 eV | 288.21 nm | f=0.0041 | <S**2>=0.000 |
| 103 ->114         | -0.11423  |           |           |          |              |
| 104 ->114         | -0.12329  |           |           |          |              |
| 105 ->114         | 0.61661   |           |           |          |              |
| 106 ->114         | -0.11980  |           |           |          |              |
| 107 ->114         | 0.24420   |           |           |          |              |
| Excited State 22: | Singlet-A | 4.3662 eV | 283.97 nm | f=0.0326 | <S**2>=0.000 |
| 104 ->114         | 0.62972   |           |           |          |              |
| 105 ->114         | 0.15770   |           |           |          |              |
| 106 ->114         | 0.13554   |           |           |          |              |
| 110 ->115         | -0.16634  |           |           |          |              |
| Excited State 23: | Singlet-A | 4.4504 eV | 278.59 nm | f=0.0073 | <S**2>=0.000 |
| 109 ->115         | 0.13758   |           |           |          |              |
| 110 ->116         | 0.67425   |           |           |          |              |
| Excited State 24: | Singlet-A | 4.4871 eV | 276.31 nm | f=0.0033 | <S**2>=0.000 |
| 111 ->117         | -0.11582  |           |           |          |              |
| 111 ->118         | 0.64608   |           |           |          |              |
| 113 ->119         | -0.12271  |           |           |          |              |
| Excited State 25: | Singlet-A | 4.5981 eV | 269.64 nm | f=0.0558 | <S**2>=0.000 |
| 103 ->114         | 0.56617   |           |           |          |              |
| 105 ->114         | 0.14260   |           |           |          |              |
| 107 ->115         | 0.11061   |           |           |          |              |
| 109 ->115         | 0.24862   |           |           |          |              |
| 113 ->119         | 0.14037   |           |           |          |              |
| Excited State 26: | Singlet-A | 4.6295 eV | 267.81 nm | f=0.0029 | <S**2>=0.000 |
| 103 ->114         | -0.31111  |           |           |          |              |
| 109 ->115         | 0.55523   |           |           |          |              |
| 113 ->119         | 0.13118   |           |           |          |              |
| Excited State 27: | Singlet-A | 4.6418 eV | 267.10 nm | f=0.0615 | <S**2>=0.000 |
| 109 ->115         | -0.14256  |           |           |          |              |
| 111 ->118         | 0.10484   |           |           |          |              |
| 111 ->121         | 0.11979   |           |           |          |              |
| 112 ->119         | -0.10786  |           |           |          |              |



113 ->119 0.61608

Excited State 28: Singlet-A 4.7577 eV 260.59 nm f=0.0236 <S\*\*2>=0.000  
109 ->116 0.27602  
111 ->121 0.16228  
112 ->119 0.46782  
113 ->120 -0.34471

Excited State 29: Singlet-A 4.7731 eV 259.76 nm f=0.0089 <S\*\*2>=0.000  
107 ->115 0.21167  
109 ->116 0.51861  
112 ->119 -0.31514  
113 ->119 -0.10042

Excited State 30: Singlet-A 4.8107 eV 257.73 nm f=0.0291 <S\*\*2>=0.000  
109 ->116 0.27787  
111 ->119 0.10900  
111 ->121 -0.20458  
112 ->119 0.21631  
113 ->119 0.14494  
113 ->120 0.47616  
113 ->121 -0.12391

Excited State 31: Singlet-A 4.8633 eV 254.94 nm f=0.0077 <S\*\*2>=0.000  
105 ->115 -0.11500  
106 ->115 0.34877  
107 ->115 0.49262  
107 ->116 -0.14406  
112 ->119 0.13687  
113 ->121 0.11561

Excited State 32: Singlet-A 4.8841 eV 253.85 nm f=0.0383 <S\*\*2>=0.000  
110 ->117 0.67121  
112 ->119 0.11108

Excited State 33: Singlet-A 5.0164 eV 247.16 nm f=0.0154 <S\*\*2>=0.000  
105 ->115 0.15455  
106 ->115 0.50334  
107 ->115 -0.22939  
108 ->115 -0.30955

Excited State 34: Singlet-A 5.0802 eV 244.05 nm f=0.0153 <S\*\*2>=0.000  
110 ->118 -0.15050  
111 ->119 0.52546  
113 ->121 -0.34854

Excited State 35: Singlet-A 5.1479 eV 240.85 nm f=0.0589 <S\*\*2>=0.000  
106 ->115 0.23033  
107 ->115 -0.14084  
108 ->115 0.45922  
110 ->118 -0.22321  
111 ->119 0.10786  
113 ->121 0.27042

Excited State 36: Singlet-A 5.1506 eV 240.72 nm f=0.0061 <S\*\*2>=0.000  
106 ->115 0.14635  
106 ->116 -0.17265  
108 ->115 0.23890  
109 ->118 0.11669  
110 ->118 0.56891

Excited State 37: Singlet-A 5.2094 eV 238.00 nm f=0.0348 <S\*\*2>=0.000  
106 ->116 0.30341  
107 ->116 0.31467  
108 ->115 0.11999  
108 ->116 -0.12356  
109 ->115 -0.11319  
109 ->117 0.36216  
111 ->119 -0.17508  
111 ->120 -0.13526  
113 ->121 -0.16640

Excited State 38: Singlet-A 5.2194 eV 237.54 nm f=0.0081 <S\*\*2>=0.000  
106 ->116 0.15554  
107 ->116 0.10114  
108 ->115 -0.25468  
109 ->117 0.20857  
110 ->118 0.20906  
111 ->119 0.31816  
111 ->120 0.17045  
112 ->120 -0.12246  
112 ->121 -0.10969  
113 ->121 0.30144

Excited State 39: Singlet-A 5.2623 eV 235.61 nm f=0.0072 <S\*\*2>=0.000  
107 ->116 0.11426  
108 ->116 0.11285  
109 ->117 0.13057  
111 ->120 0.10582  
112 ->119 -0.12338  
112 ->120 0.60004  
113 ->120 -0.10003

Excited State 40: Singlet-A 5.2988 eV 233.99 nm f=0.0160 <S\*\*2>=0.000  
104 ->115 0.15956  
105 ->116 0.15174  
106 ->116 0.42719  
107 ->116 -0.27396  
108 ->116 -0.29159  
109 ->117 -0.13034  
110 ->118 0.11539  
112 ->120 0.18514

Excited State 41: Singlet-A 5.3569 eV 231.45 nm f=0.0043 <S\*\*2>=0.000  
106 ->116 0.23066  
108 ->116 0.32084  
111 ->120 0.20483  
112 ->120 -0.10581  
112 ->121 0.48865

Excited State 42: Singlet-A 5.3827 eV 230.34 nm f=0.0046 <S\*\*2>=0.000  
106 ->116 0.19008  
107 ->117 -0.11211  
108 ->116 0.47604  
112 ->121 -0.39969

Excited State 43: Singlet-A 5.4083 eV 229.25 nm f=0.1751 <S\*\*2>=0.000  
104 ->115 0.38268  
105 ->115 0.10464  
106 ->116 -0.16401  
107 ->116 -0.17642  
107 ->117 -0.11803  
109 ->117 0.31810  
109 ->118 -0.28836

Excited State 44: Singlet-A 5.4326 eV 228.22 nm f=0.0101 <S\*\*2>=0.000  
102 ->114 0.16363  
105 ->115 0.57934  
107 ->115 0.20014  
109 ->117 -0.11005  
111 ->120 -0.11958

Excited State 45: Singlet-A 5.4489 eV 227.54 nm f=0.0006 <S\*\*2>=0.000  
102 ->114 0.64540  
105 ->115 -0.12692  
111 ->120 0.16194

Excited State 46: Singlet-A 5.4807 eV 226.22 nm f=0.0124 <S\*\*2>=0.000

100 ->114 -0.23961  
101 ->114 0.19987  
102 ->114 0.13808  
103 ->115 -0.10328  
104 ->115 -0.19897  
109 ->118 -0.18857  
111 ->120 -0.10507  
111 ->121 0.16781  
113 ->122 0.43012

Excited State 47: Singlet-A 5.5015 eV 225.37 nm f=0.0621 <S\*\*2>=0.000

100 ->114 0.23975  
101 ->114 -0.17767  
103 ->115 0.12739  
106 ->117 -0.10970  
107 ->116 0.16829  
109 ->118 0.13177  
111 ->120 0.21300  
111 ->121 0.10324  
112 ->122 -0.10107  
113 ->122 0.42764

Excited State 48: Singlet-A 5.5346 eV 224.02 nm f=0.0222 <S\*\*2>=0.000

104 ->115 -0.26849  
105 ->115 0.16586  
107 ->117 -0.22299  
108 ->116 -0.11954  
111 ->120 0.41425  
112 ->121 -0.14051  
113 ->121 -0.13108  
113 ->122 -0.11303  
113 ->123 0.10605

Excited State 49: Singlet-A 5.5548 eV 223.20 nm f=0.0278 <S\*\*2>=0.000

100 ->114 -0.24516  
101 ->114 0.29052  
104 ->115 0.34898  
107 ->116 0.10953  
107 ->117 0.12770  
110 ->119 -0.14344  
111 ->120 0.24071  
113 ->121 -0.10523

Excited State 50: Singlet-A 5.5971 eV 221.52 nm f=0.3068 <S\*\*2>=0.000

105 ->116 -0.23973  
107 ->117 0.16790

110 ->119 0.15418  
111 ->121 0.34851  
113 ->120 0.15887  
113 ->122 -0.13031  
113 ->123 0.38273

Excited State 51: Singlet-A 5.6245 eV 220.44 nm f=0.0377 <S\*\*2>=0.000

105 ->116 0.27856  
107 ->117 0.25760  
110 ->119 0.25134  
111 ->121 -0.19794  
112 ->122 -0.16703  
113 ->120 -0.10374  
113 ->122 0.11229  
113 ->123 0.29587  
113 ->124 0.21572

Excited State 52: Singlet-A 5.6343 eV 220.05 nm f=0.0832 <S\*\*2>=0.000

103 ->115 -0.13358  
105 ->116 -0.10829  
107 ->117 0.19326  
110 ->119 0.43097  
111 ->120 0.10085  
113 ->123 -0.37643  
113 ->124 -0.15653

Excited State 53: Singlet-A 5.6411 eV 219.79 nm f=0.3031 <S\*\*2>=0.000

103 ->115 -0.13789  
105 ->116 0.22921  
109 ->117 0.16348  
109 ->118 0.37368  
111 ->121 0.13076  
112 ->122 0.28176  
112 ->125 -0.10729  
113 ->122 0.10099  
113 ->124 0.21434

Excited State 54: Singlet-A 5.6804 eV 218.27 nm f=0.0302 <S\*\*2>=0.000

104 ->116 0.19742  
105 ->116 0.27118  
107 ->116 0.11384  
107 ->117 0.16546  
109 ->118 -0.20397  
112 ->122 0.35766  
113 ->124 -0.32231

Excited State 55: Singlet-A 5.6932 eV 217.77 nm f=0.1248 <S\*\*2>=0.000  
101 ->114 0.13860  
103 ->115 -0.12258  
104 ->116 0.21958  
105 ->116 0.14729  
106 ->117 -0.19196  
106 ->118 0.11019  
107 ->117 -0.14419  
107 ->118 0.13816  
108 ->117 0.24140  
109 ->118 0.17675  
111 ->121 0.13873  
112 ->122 -0.15132  
113 ->122 -0.11436  
113 ->123 0.13431  
113 ->124 -0.20188

Excited State 56: Singlet-A 5.7106 eV 217.11 nm f=0.0709 <S\*\*2>=0.000  
104 ->116 -0.18794  
105 ->116 0.23858  
106 ->117 0.39136  
107 ->117 -0.14292  
108 ->117 -0.16357  
110 ->119 0.13909  
112 ->122 -0.21471  
113 ->124 -0.22602

Excited State 57: Singlet-A 5.7214 eV 216.70 nm f=0.0515 <S\*\*2>=0.000  
101 ->114 0.19353  
103 ->115 0.19094  
104 ->116 0.43783  
106 ->117 0.17131  
108 ->117 -0.22790  
110 ->119 0.15879  
113 ->123 -0.10885  
113 ->124 0.19923

Excited State 58: Singlet-A 5.7396 eV 216.01 nm f=0.0513 <S\*\*2>=0.000  
99 ->114 0.13143  
100 ->114 0.24059  
101 ->114 0.29713  
103 ->115 0.23650  
104 ->116 -0.24899  
107 ->117 -0.12148  
110 ->119 0.16992  
112 ->122 0.23811

Excited State 59: Singlet-A 5.7444 eV 215.84 nm f=0.1251 <S\*\*2>=0.000

|           |          |
|-----------|----------|
| 99 ->114  | 0.20373  |
| 100 ->114 | 0.37849  |
| 101 ->114 | 0.23903  |
| 103 ->115 | -0.25745 |
| 106 ->118 | -0.12772 |
| 107 ->118 | -0.12166 |
| 110 ->119 | -0.14531 |
| 111 ->121 | 0.14409  |
| 112 ->122 | -0.10573 |
| 113 ->123 | -0.11229 |

Excited State 60: Singlet-A 5.7640 eV 215.10 nm f=0.0240 <S\*\*2>=0.000

|           |          |
|-----------|----------|
| 103 ->115 | 0.29635  |
| 106 ->117 | 0.16461  |
| 108 ->117 | 0.46809  |
| 108 ->118 | 0.13178  |
| 111 ->121 | 0.15247  |
| 113 ->123 | -0.12717 |
| 113 ->124 | 0.17370  |
